# Supplementary material for: Hesperetin and its sulfate and glucuronide metabolites inhibit TNF-α induced human aortic endothelial cell migration and decrease plasminogen activator inhibitor-1 (PAI-1) levels
Source: Royal Society of Chemistry journal article supplement (doi:10.1039/c5fo00771b), 2015-09-29
Supplement: c5fo00771b1.pdf [file c5fo00771b1.pdf]

Supplementary Figure S1.

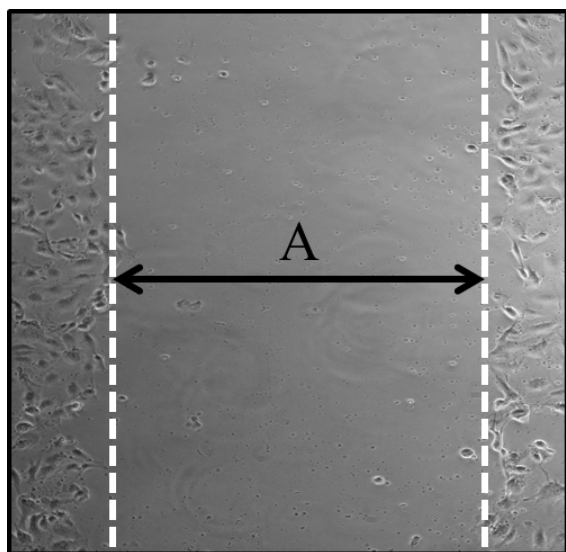

Scratched area  
at time 0 (T<sub>0</sub>)

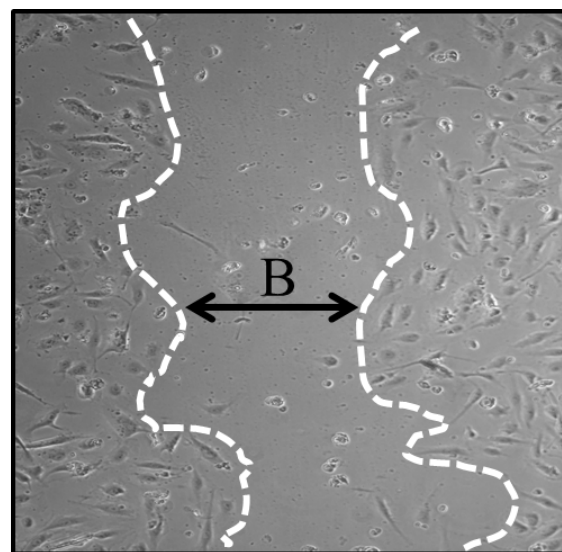

Scratched area  
at time x (T<sub>x</sub>)

$$\text{Covered Surface (\%)} = \frac{(A-B)*100}{A}$$

The ability of the cells to migrate in the presence of the tested compounds was calculated by measuring the uncovered surface (scratched area in  $\mu\text{m}^2$ ) in each picture at time 0, 12 and 16 hours. The data are expressed as the percentage of surface covered by the cells at 12 and 16 hours compared to the surface measured at time 0 (100% of uncovered surface). Data are presented as the mean  $\pm$  SD representative of 3 independent experiments. Each experiment was performed in duplicate (n=2 wells per treatment).
