# Supplementary material for: Hesperetin and its sulfate and glucuronide metabolites inhibit TNF-α induced human aortic endothelial cell migration and decrease plasminogen activator inhibitor-1 (PAI-1) levels
Source: Royal Society of Chemistry journal article supplement (doi:10.1039/c5fo00771b), 2015-09-29
Supplement: c5fo00771b2.pdf [file c5fo00771b2.pdf]

**Supplementary Figure S2.**

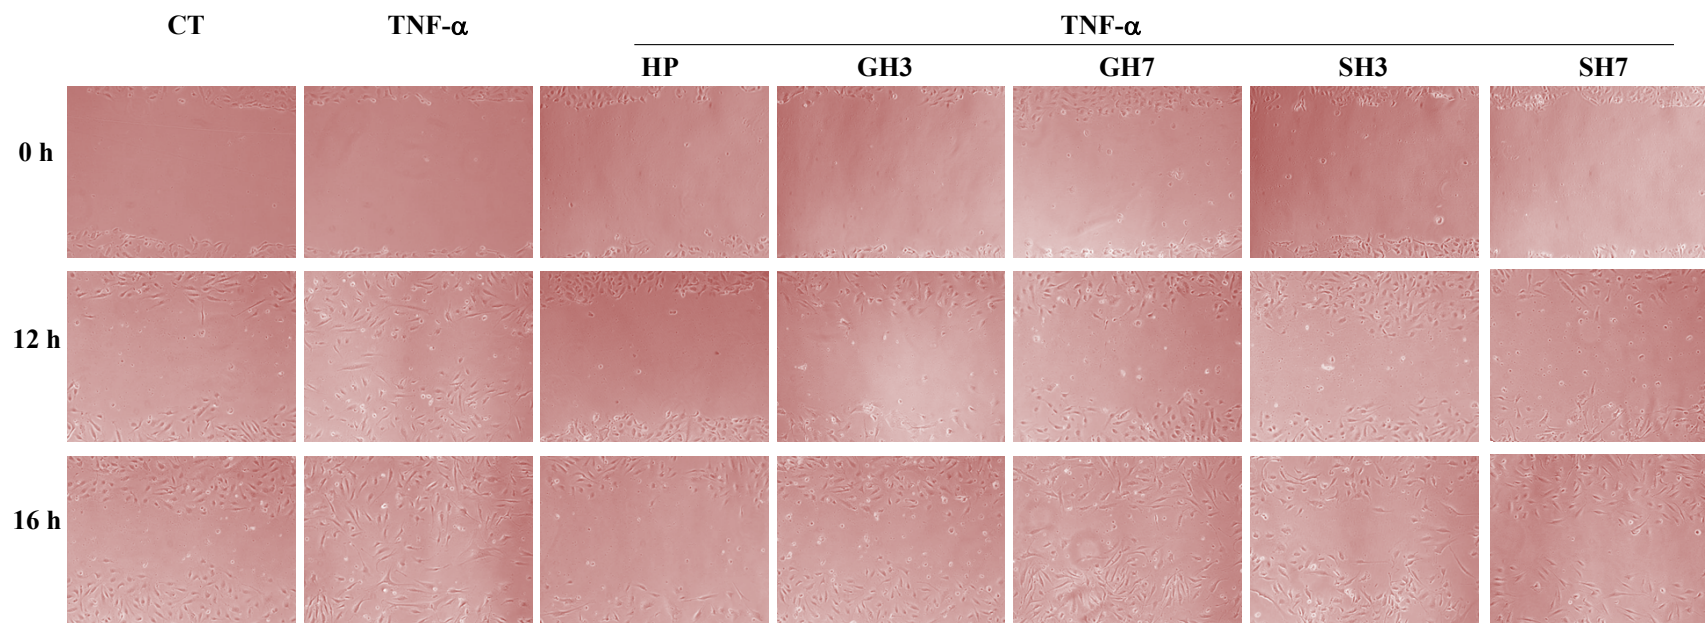

Representative photomicrographs showing migration of HAECs in control medium at times 0, 12 and 16 h and the effects of TNF- $\alpha$  alone in comparison to treatment with each metabolite (10  $\mu$ M) on TNF- $\alpha$ -stimulated HAECs. Hesperetin (HP), hesperetin 3'-*O*-glucuronide (GH3), hesperetin 7-*O*-glucuronide (GH7), hesperetin 3'-*O*-sulfate (SH3) and hesperetin 7-*O*-sulfate (SH7) were co-treated with TNF- $\alpha$  (50 ng/mL) and each of the metabolites.
